# Supplementary material for: Unlocking the application potential of AlphaFold3-like approaches in virtual screening
Source: Royal Society of Chemistry journal article supplement (doi:10.1039/d5sc06481c), 2025-12-11
Supplement: d5sc06481c1.pdf [file d5sc06481c1.pdf]

## Supporting Information

### Unlocking the application potential of AlphaFold3-like approaches in virtual screening

Chao Shen<sup>1,2,3,\*</sup>, Xujun Zhang<sup>2,4</sup>, Shukai Gu<sup>2,4</sup>, Odin Zhang<sup>2,4</sup>, Qinghan Wang<sup>2,4</sup>, Gang Du<sup>2,4</sup>, Yihao Zhao<sup>2,4</sup>, Linlong Jiang<sup>2,4</sup>, Peichen Pan<sup>2,4</sup>, Yu Kang<sup>2,4</sup>, Qingwei Zhao<sup>1,3</sup>, Chang-Yu Hsieh<sup>1,2,4</sup>, Tingjun Hou<sup>1,2,4\*</sup>

<sup>1</sup>Department of Clinical Pharmacy, The First Affiliated Hospital, Zhejiang University School of Medicine, Hangzhou 310003, Zhejiang, China

<sup>2</sup>College of Pharmaceutical Sciences, Zhejiang University, Hangzhou 310058, Zhejiang, China

<sup>3</sup>Zhejiang Provincial Key Laboratory for Drug Evaluation and Clinical Research, Hangzhou 310003, Zhejiang, China

<sup>4</sup>Zhejiang Provincial Key Laboratory for Intelligent Drug Discovery and Development, Jinhua 321016, Zhejiang, China

### Corresponding authors

**Tingjun Hou**

**E-mail:** tingjunhou@zju.edu.cn

**Chao Shen**

**E-mail:** shenchao513@zju.edu.cn

Table S1 Basic information of *GPCR<sub>recent</sub>* dataset. MW, LogP, RB, HBA, HBR and HALX represent the average molecular weight, Wildman-Crippen partition coefficient, number of rotatable bonds, number of hydrogen-bond acceptors, number of hydrogen-bond donors and number of halogens for active and decoy compounds, respectively. To evaluate scaffold diversity for actives, the Tanimoto similarity of each compound to all others was computed based on ECFP4 fingerprints and Murcko scaffolds. The average of these pairwise similarities for all active compounds within a target was then recorded as the scaffold diversity score for that target.

| Uniprot ID | Target ID | PDB entry | Release time of first crystal structure | Target Information                        | Number |       | MW     |        | LogP |      | RB   |      | HBA  |      | HBR  |      | HAL  |      | Scaffold diversity for actives |
|------------|-----------|-----------|-----------------------------------------|-------------------------------------------|--------|-------|--------|--------|------|------|------|------|------|------|------|------|------|------|--------------------------------|
|            |           |           |                                         |                                           | Act    | Dec   | Act    | Dec    | Act  | Dec  | Act  | Dec  | Act  | Dec  | Act  | Dec  | Act  | Dec  |                                |
| O15552     | FFAR2     | 8j22      | 2024/01/24                              | Free fatty acid receptor 2                | 205    | 10250 | 418.10 | 419.15 | 3.76 | 3.76 | 5.17 | 5.22 | 5.46 | 5.49 | 1.00 | 1.01 | 0.67 | 0.67 | 0.245                          |
| P0DMS8     | ADORA3    | 8x16      | 2024/4/24                               | Adenosine receptor A3AR                   | 300    | 15000 | 415.01 | 416.37 | 2.62 | 2.63 | 5.14 | 5.20 | 7.57 | 7.53 | 2.24 | 2.22 | 0.34 | 0.33 | 0.150                          |
| P13945     | ADRB3     | 9ije      | 2024/8/21                               | Beta-3 adrenergic receptor                | 300    | 15000 | 375.82 | 376.87 | 3.70 | 3.70 | 5.45 | 5.48 | 3.91 | 4.00 | 0.90 | 0.91 | 0.40 | 0.39 | 0.131                          |
| P20309     | CHRM3     | 8e9w      | 2022/11/30                              | Muscarinic acetylcholine receptor M3      | 300    | 15000 | 375.82 | 376.87 | 3.70 | 3.70 | 5.45 | 5.48 | 3.91 | 4.01 | 0.90 | 0.91 | 0.40 | 0.39 | 0.131                          |
| P25021     | HRH2      | 8yn3      | 2022/6/29                               | Histamine H2 receptor                     | 300    | 15000 | 383.12 | 384.24 | 3.24 | 3.23 | 7.28 | 7.31 | 4.44 | 4.55 | 2.31 | 2.27 | 0.35 | 0.34 | 0.156                          |
| P29275     | ADORA2B   | 8hdo      | 2023/1/18                               | Adenosine A2b receptor                    | 300    | 15000 | 393.06 | 394.15 | 2.62 | 2.62 | 4.96 | 5.01 | 7.14 | 7.10 | 1.64 | 1.63 | 0.49 | 0.47 | 0.138                          |
| P30874     | SSTR2     | 7wig      | 2022/3/9                                | Somatostatin receptor type 2              | 268    | 13400 | 515.08 | 517.18 | 4.52 | 4.54 | 7.43 | 7.50 | 5.51 | 5.63 | 2.28 | 2.26 | 0.97 | 0.95 | 0.194                          |
| P35348     | ADRA1A    | 8thk      | 2023/07/05                              | Alpha-1A adrenergic receptor              | 300    | 15000 | 376.73 | 377.69 | 3.42 | 3.43 | 5.25 | 5.30 | 4.47 | 4.54 | 1.02 | 1.02 | 0.51 | 0.50 | 0.145                          |
| P35372     | OPRM1     | 8efo      | 2022/11/9                               | Mu-type opioid receptor                   | 300    | 15000 | 414.41 | 415.75 | 3.65 | 3.67 | 5.32 | 5.37 | 4.72 | 4.80 | 1.42 | 1.42 | 0.36 | 0.36 | 0.134                          |
| P46098     | HTR3A     | 8bla      | 2024/3/6                                | Human serotonin 5-HT3A                    | 300    | 15000 | 341.32 | 341.89 | 2.87 | 2.86 | 3.17 | 3.25 | 4.47 | 4.53 | 1.01 | 1.01 | 0.43 | 0.43 | 0.156                          |
| P49682     | CXCR3     | 8hnm      | 2023/11/29                              | C-X-C chemokine receptor type 3           | 300    | 15000 | 510.71 | 512.43 | 4.43 | 4.47 | 6.45 | 6.54 | 6.01 | 6.07 | 0.74 | 0.76 | 1.79 | 1.76 | 0.172                          |
| P50406     | HTR6      | 7ys6      | 2022/7/27                               | 5-hydroxytryptamine receptor 6            | 300    | 15000 | 388.58 | 389.44 | 3.71 | 3.69 | 4.60 | 4.65 | 4.52 | 4.59 | 1.00 | 1.00 | 0.58 | 0.57 | 0.141                          |
| Q5NUL3     | FFAR4     | 8h4k      | 2023/3/8                                | Free fatty acid receptor 4                | 300    | 14996 | 386.75 | 387.32 | 4.95 | 4.90 | 7.01 | 7.04 | 3.72 | 3.76 | 1.04 | 1.03 | 1.38 | 1.36 | 0.196                          |
| Q8TDV5     | GPR119    | 7wcm      | 2022/08/24                              | Glucose-dependent insulinotropic receptor | 300    | 14914 | 464.99 | 467.14 | 3.87 | 3.88 | 5.64 | 5.62 | 7.19 | 7.21 | 0.43 | 0.44 | 0.74 | 0.73 | 0.169                          |
| Q96RJ0     | TAAR1     | 9jkq      | 2023/11/15                              | Trace amine-associated receptor 1         | 300    | 15000 | 330.85 | 331.19 | 2.96 | 2.91 | 4.44 | 4.48 | 4.18 | 4.24 | 1.48 | 1.46 | 0.61 | 0.60 | 0.144                          |
| Q9Y5N1     | HRH3      | 8yuu      | 2022/10/26                              | Histamine H3 receptor                     | 300    | 15000 | 367.06 | 367.93 | 3.51 | 3.51 | 5.70 | 5.72 | 4.13 | 4.21 | 0.89 | 0.88 | 0.27 | 0.27 | 0.147                          |

Table S2 Basic information of the subset of LIT-PCBA dataset used in this study.

| Target     | Target name                        | Actives | Inactives | PDB entry |
|------------|------------------------------------|---------|-----------|-----------|
| ESR_ago    | Estrogen receptor $\alpha$         | 13      | 4378      | 2P15      |
| ESR_antago | Estrogen receptor $\alpha$         | 88      | 3820      | 2IOK      |
| TP53       | Cellular tumor antigen p53         | 24      | 4071      | 3ZME      |
| VDR        | Vitamin D receptor                 | 64      | 3345      | 3A2I      |
| MAPK1      | Mitogen-activated protein kinase 1 | 308     | 61567     | 4ZZN      |

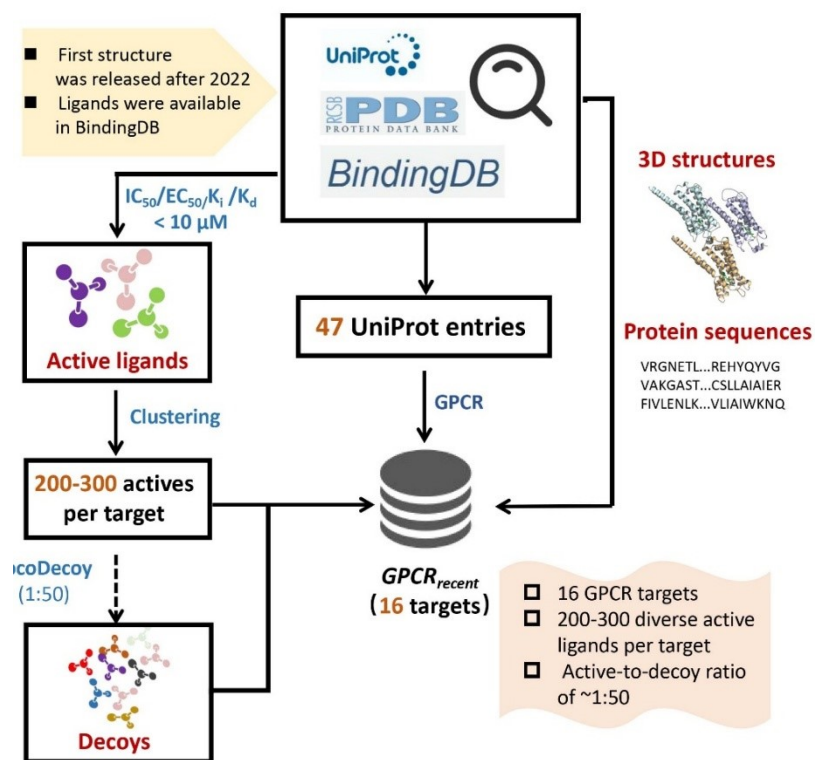

Figure S1. Workflow to construct the  $GPCR_{recent}$  dataset.

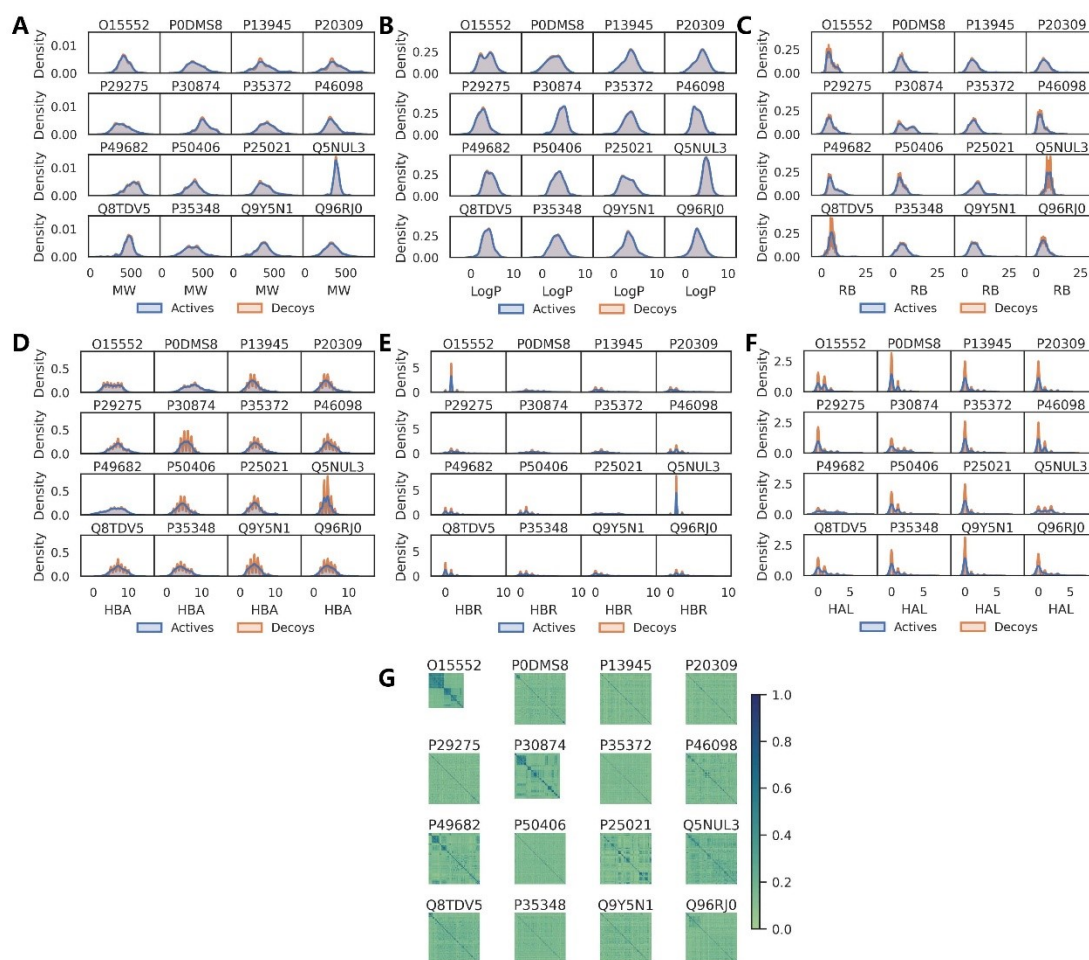

Figure S2. Molecular property distributions and scaffold diversity of active compounds in the *GPCR<sub>recent</sub>* dataset. (A–F) show the distributions of key physicochemical properties: molecular weight (MW), Wildman–Crippen partition coefficient (LogP), number of rotatable bonds (RB), number of hydrogen-bond acceptors (HBA), number of hydrogen-bond donors (HBD), and number of halogen atoms (HAL). (G) Scaffold diversity was calculated as the pairwise Tanimoto similarity based on ECFP4 fingerprints and Murcko scaffolds across different targets.

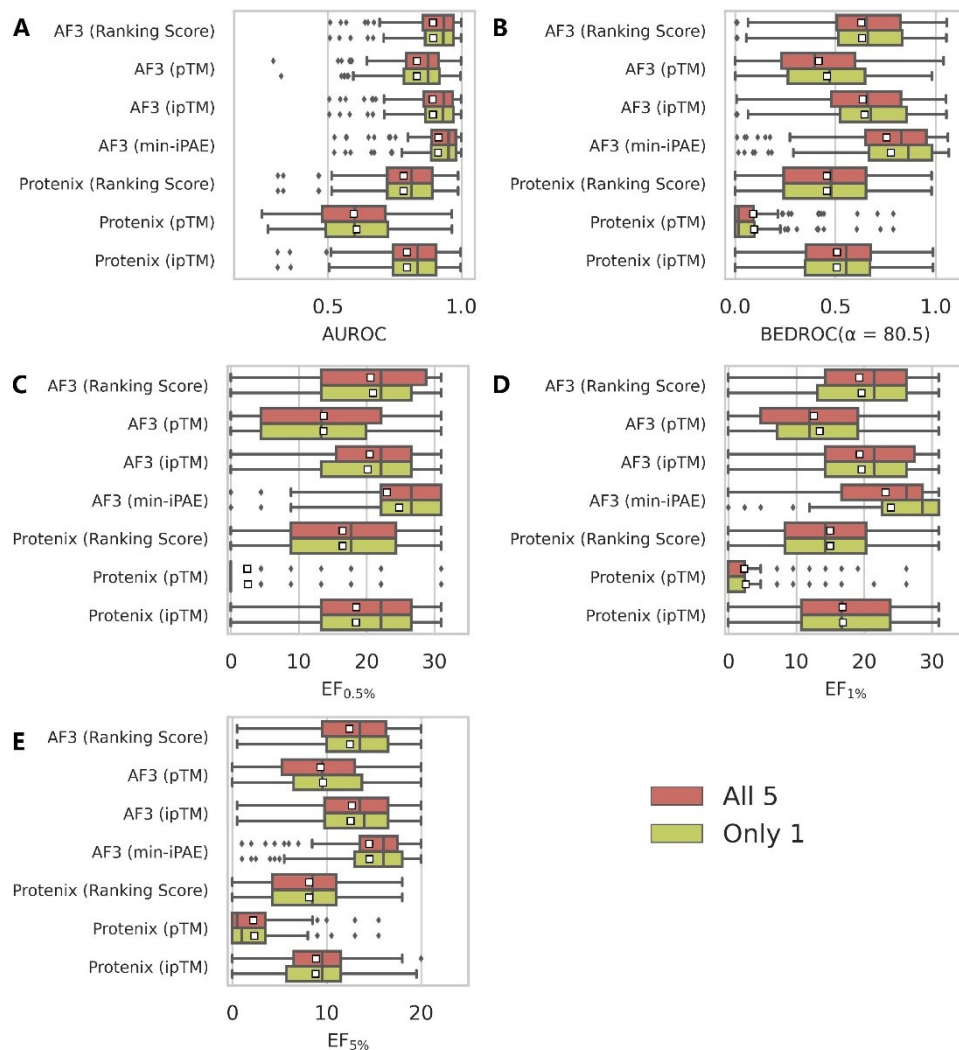

Figure S3. Impact of the number of diffusion samples on performance of AF3 and Protenix on the DEKOIS2.0 benchmark set (N=79). Evaluation metrics include (A) AUROC, (B) BEDROC ( $\alpha = 80.5$ ), (C) EF<sub>0.5%</sub>, (D) EF<sub>1%</sub>, and (E) EF<sub>5%</sub>. "All 5" denotes the strategy where the top-ranked prediction (by the model's internal Ranking Score) among five samples was selected as the final pose, while "Only 1" refers to using the first generated prediction directly, mimicking the scenario when only one sample was generated using AF3/Protenix. White squares within the box plots represent the mean value for each metric.

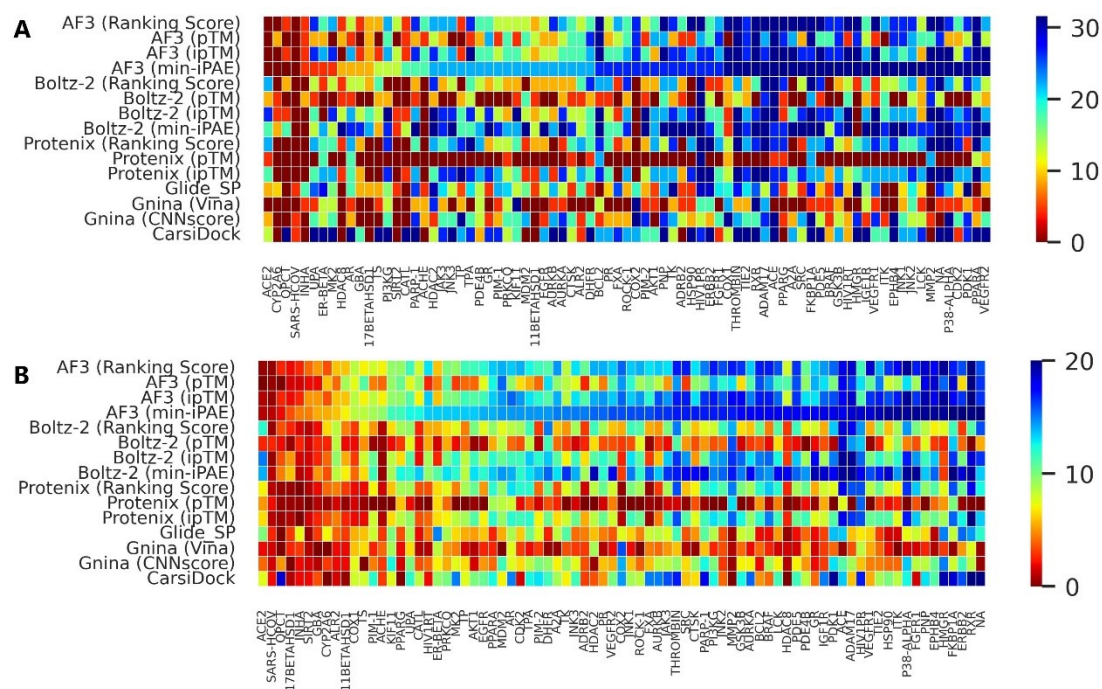

Figure S4. Performance distribution of several representative screening approaches across all targets in DEKOIS2.0 benchmark set (N=79), evaluated by (A)  $EF_{0.5\%}$ , and (B)  $EF_{5\%}$ . Targets are sorted in ascending order based on the performance of AF3 (min-iPAE) for each individual metric.

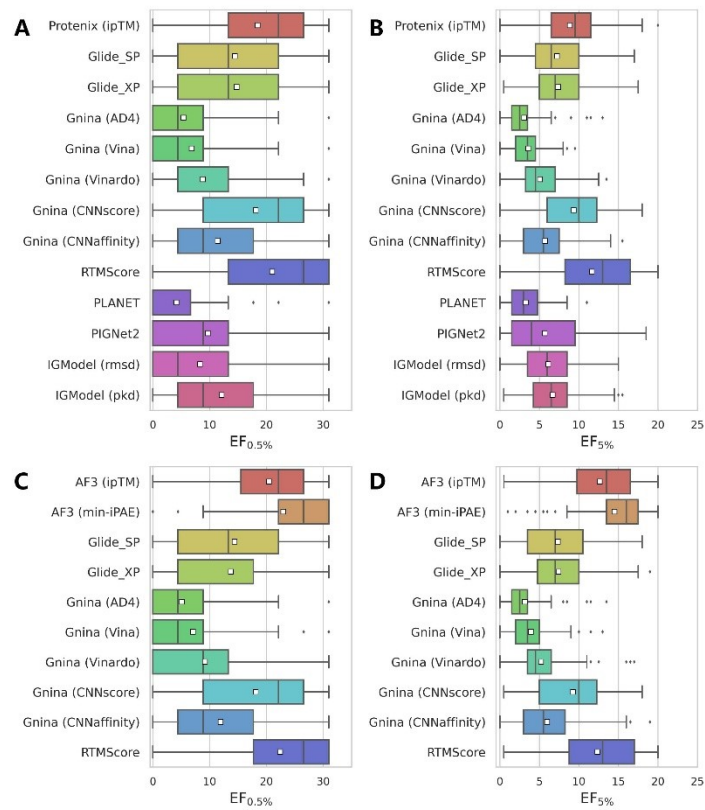

Figure S5. Performance comparison of multiple scoring approaches applied to structures predicted by (A-B) Protenix and (C-D) AF3 on the DEKOIS2.0 benchmark set (N=79). Performance metrics include (A, C)  $EF_{0.5\%}$ , and (B, D)  $EF_{5\%}$ . White squares in box plots indicate mean values for each metric.



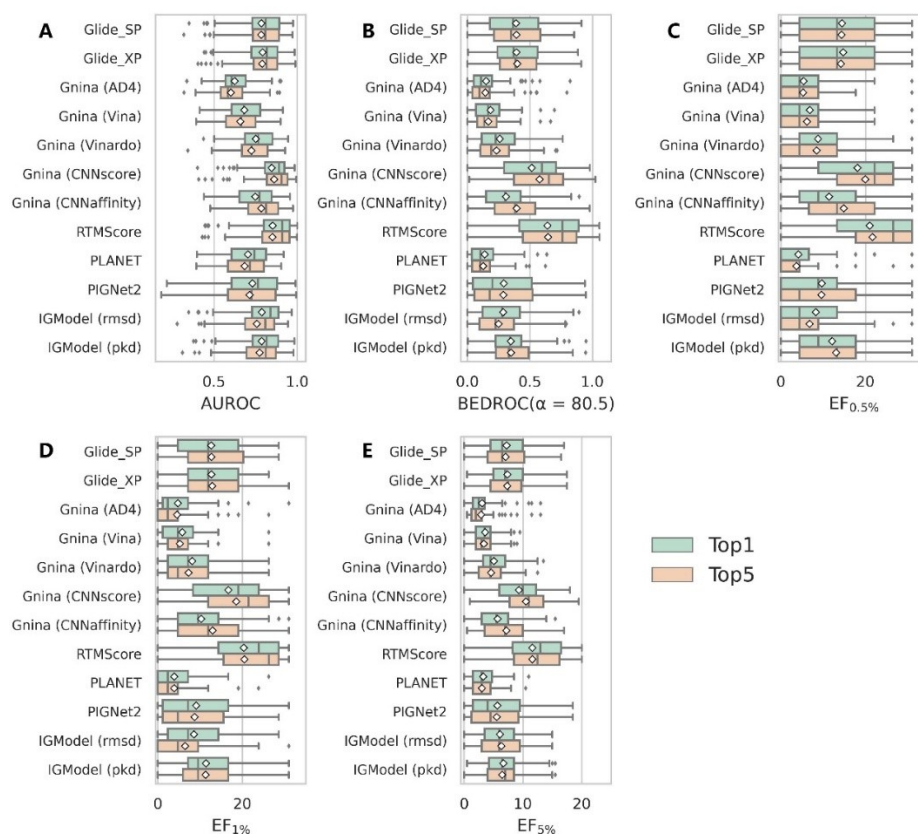

Figure S6. Impact of the number of Protenix-predicted structures on performance of multiple scoring approaches on the DEKOIS2.0 benchmark set (N=79). Evaluation metrics include (A) AUROC, (B) BEDROC ( $\alpha = 80.5$ ), (C) EF<sub>0.5%</sub>, (D) EF<sub>1%</sub>, and (E) EF<sub>5%</sub>. White squares in box plots indicate mean values for each metric.

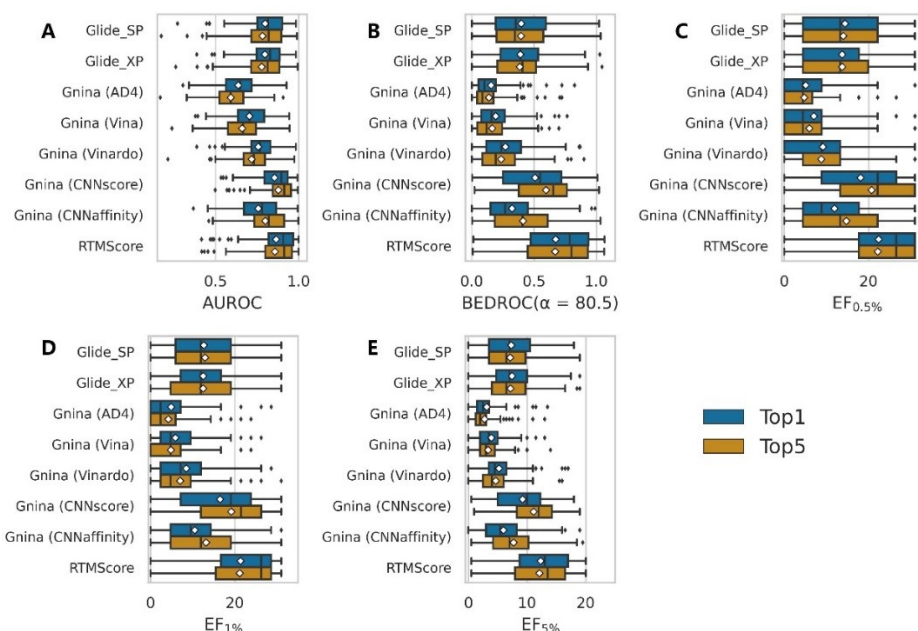

Figure S7. Impact of the number of AF3-predicted structures on performance of multiple scoring approaches on the DEKOIS2.0 benchmark set (N=79). Evaluation metrics include (A) AUROC, (B) BEDROC ( $\alpha = 80.5$ ), (C) EF<sub>0.5%</sub>, (D) EF<sub>1%</sub>, and (E) EF<sub>5%</sub>. White squares in box plots indicate mean values for each metric.

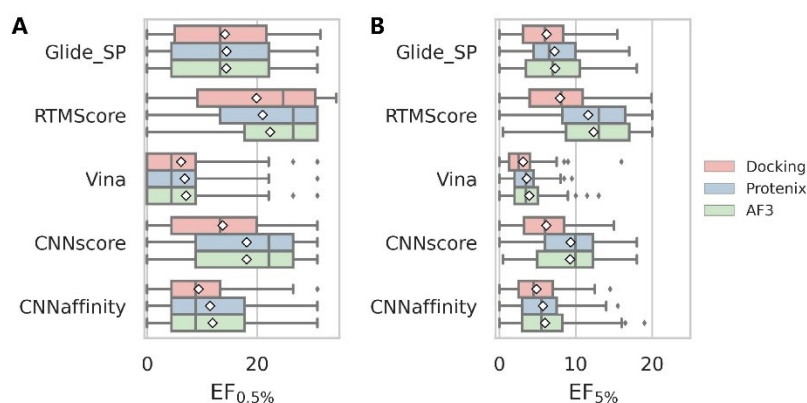

Figure S8. Evaluation of pose generation methods in screening performance, indicated by (A)  $EF_{0.5\%}$ , and (B)  $EF_{5\%}$ . The docking engine employed for RTMScore rescoring is Glide SP. White squares in box plots indicate mean values for each metric.

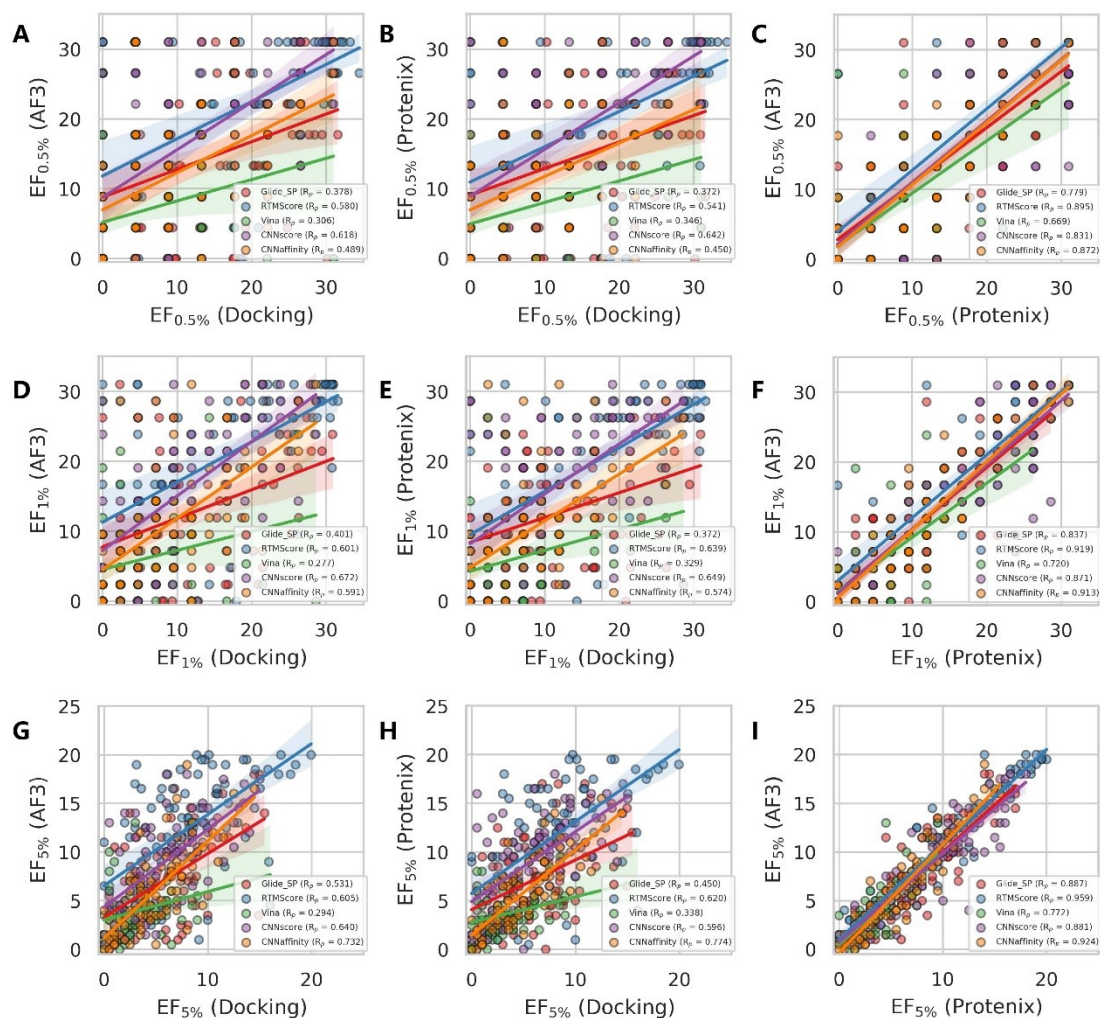

Figure S9. Pairwise correlation analysis of (A-C)  $EF_{0.5\%}$ , (D-F)  $EF_{1\%}$  and (G-I)  $EF_{5\%}$  values between different approaches: (A, D, G) Glide/Gnina vs AF3, (B, E, H) Glide/Gnina vs Protenix, and (C, F, I) AF3 vs Protenix. The docking engine employed for RTMScore rescoring is Glide SP.

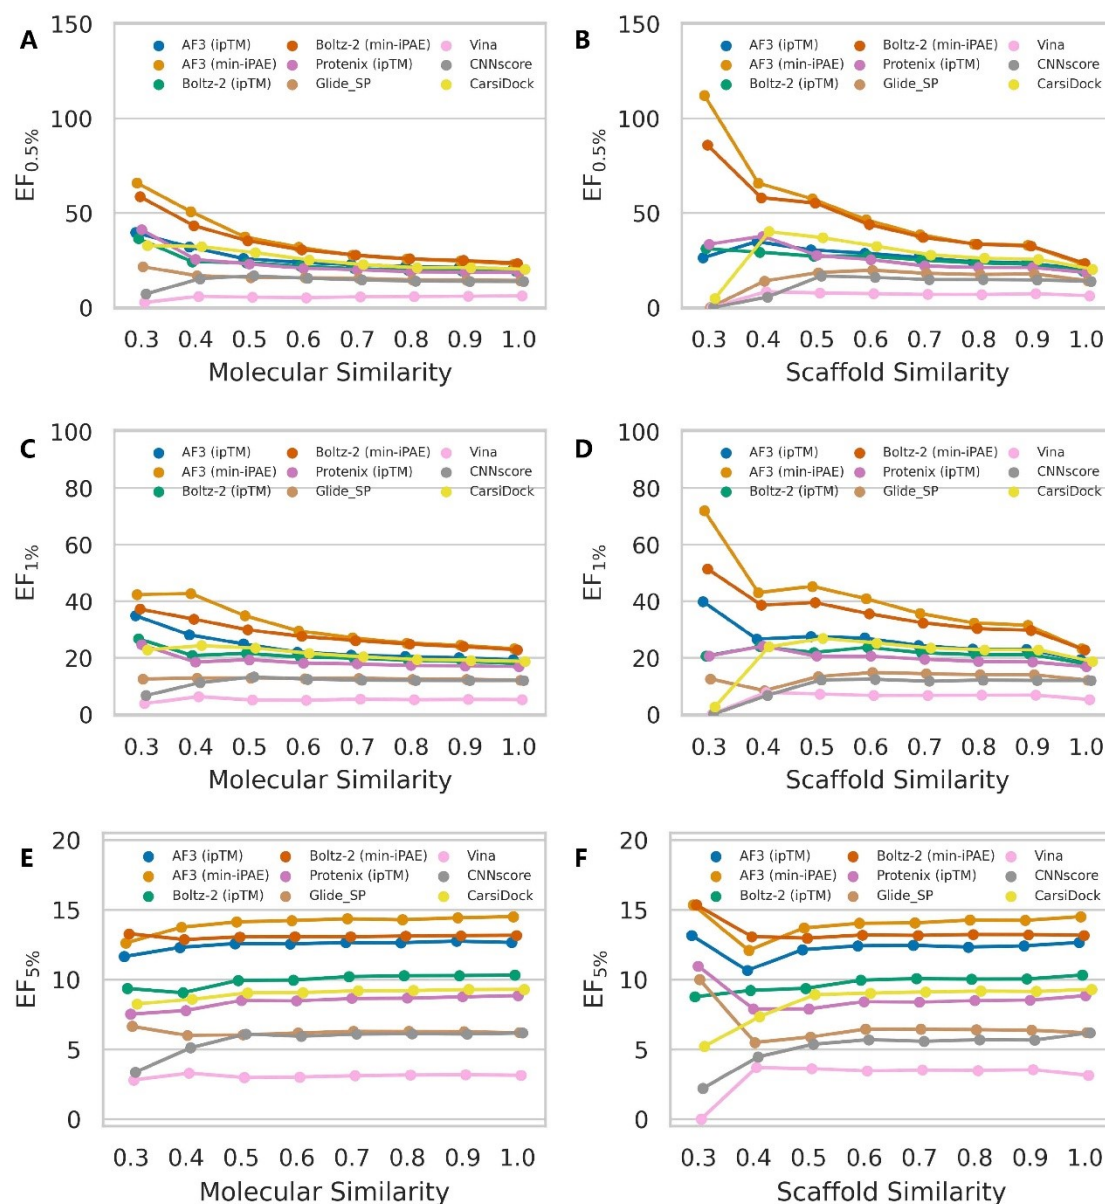

Figure S10. Impact of ligand similarity on the screening performance of multiple docking tools. Performance metrics include (A-B)  $EF_{0.5\%}$ , (C-D)  $EF_{1\%}$  and (E-F)  $EF_{5\%}$ . For each active compound in the DEKOIS2.0 dataset, ECFP4 fingerprints were computed either for (A, C, E) the entire molecule or (B, D, F) the Murcko scaffold. The minimum Tanimoto similarity to all ligands in the RCSB PDB was then determined. Data point represents the mean value across targets for each metric. Targets for which no active compounds met the specified similarity threshold were excluded from metric calculations.



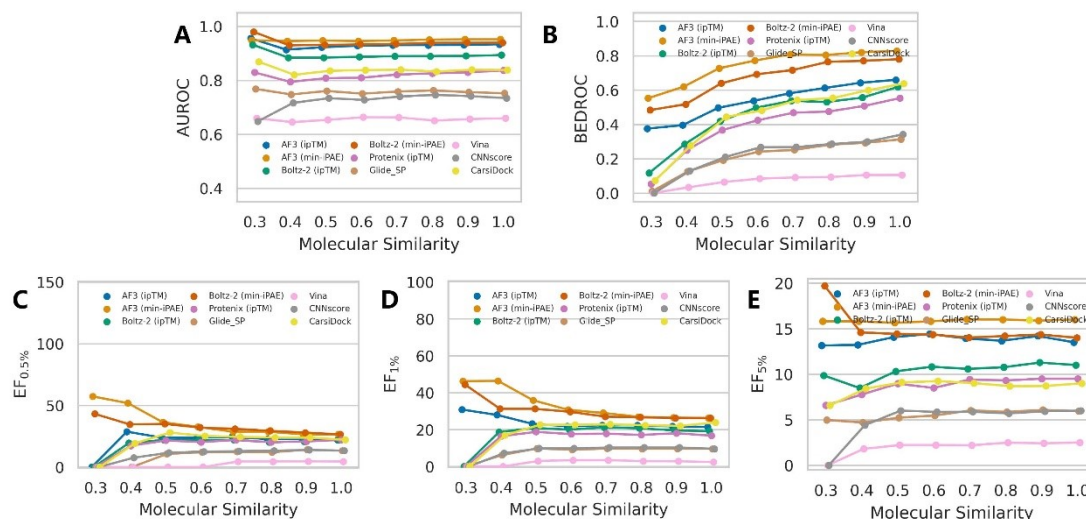

Figure S11. Impact of ligand similarity on the screening performance of multiple docking tools. Performance metrics include (A) AUROC, (B) BEDROC ( $\alpha = 80.5$ ), (C) EF<sub>0.5%</sub>, (D) EF<sub>1%</sub> and (E) EF<sub>5%</sub>. For each active compound in the DEKOIS2.0 dataset, ECFP4 fingerprints were computed the entire molecule. The minimum Tanimoto similarity to all ligands in the RCSB PDB was then determined. Data point represents the median value across targets for each metric. Targets for which no active compounds met the specified similarity threshold were excluded from metric calculations.

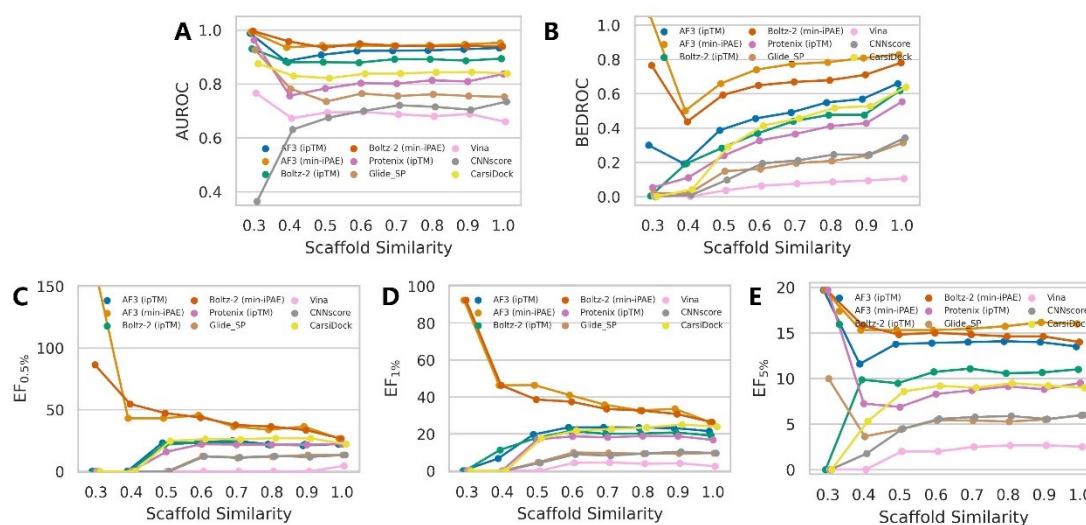

Figure S12. Impact of ligand similarity on the screening performance of multiple docking tools. Performance metrics include (A) AUROC, (B) BEDROC ( $\alpha = 80.5$ ), (C) EF<sub>0.5%</sub>, (D) EF<sub>1%</sub> and (E) EF<sub>5%</sub>. For each active compound in the DEKOIS2.0 dataset, ECFP4 fingerprints were computed the Murcko scaffold. The minimum Tanimoto similarity to all ligands in the RCSB PDB was then determined. Data point represents the median value across targets for each metric. Targets for which no active compounds met the specified similarity threshold were excluded from metric calculations.

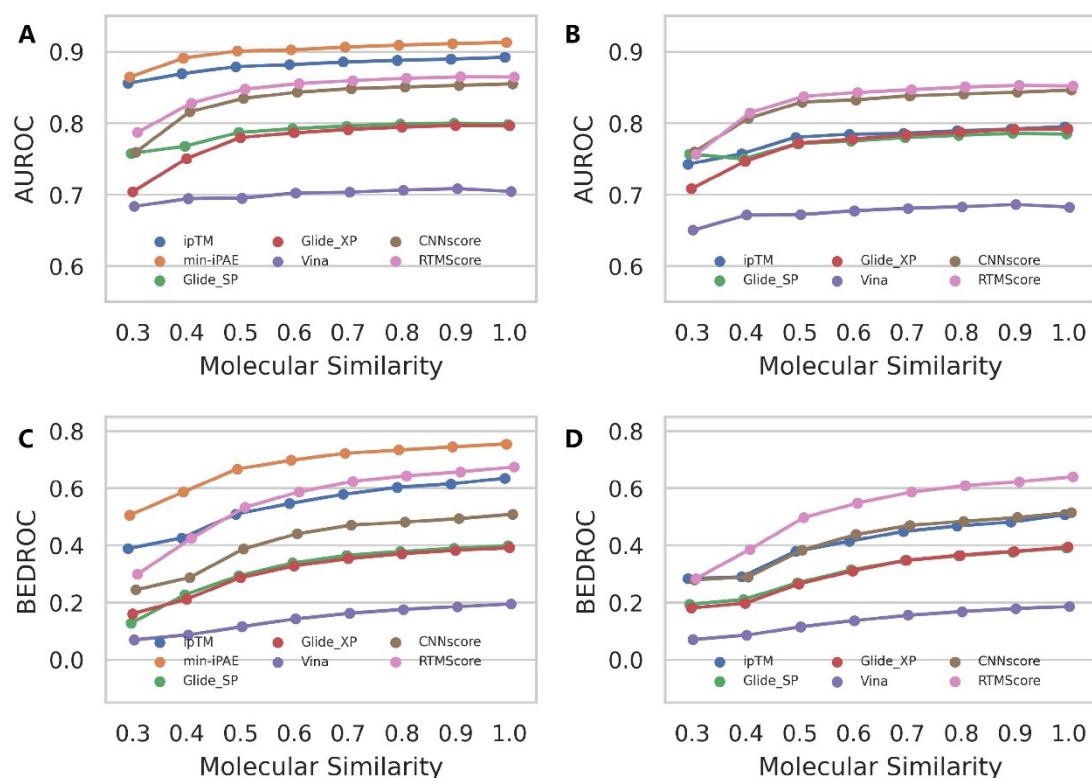

Figure S13. Impact of ligand similarity on the screening performance of multiple scoring schemes based on the structures predicted by (A, C) AF3 and (B, D) Protenix. Performance metrics include (A-B) AUROC and (C-D) BEDROC ( $\alpha = 80.5$ ). For each active compound in the DEKOIS2.0 dataset, ECFP4 fingerprints were computed for the entire molecule. The minimum Tanimoto similarity to all ligands in the RCSB PDB was then determined. Data point represents the mean value across targets for each metric. Targets for which no active compounds met the specified similarity threshold were excluded from metric calculations.

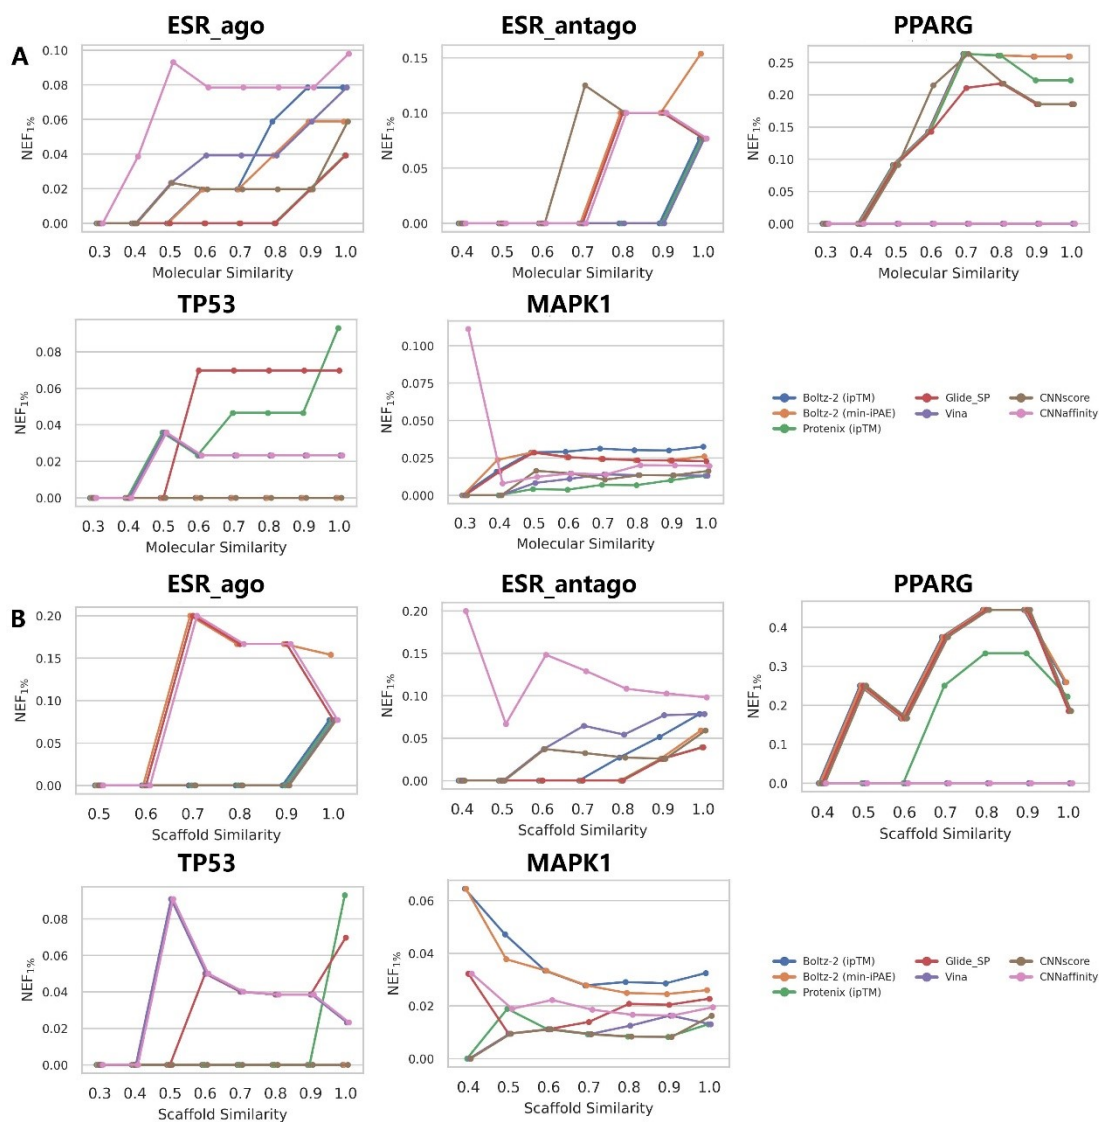

Figure S14. Impact of ligand similarity on the screening performance evaluated by NEF<sub>1</sub>% across five targets from the LIT-PCBA dataset. For each active compound, ECFP4 fingerprints were computed for (A) the entire molecule or (B) the Murcko scaffold. The minimum Tanimoto similarity to all ligands in the RCSB PDB was then determined. Targets lacking active compounds above the specified similarity threshold were excluded from metric calculations.

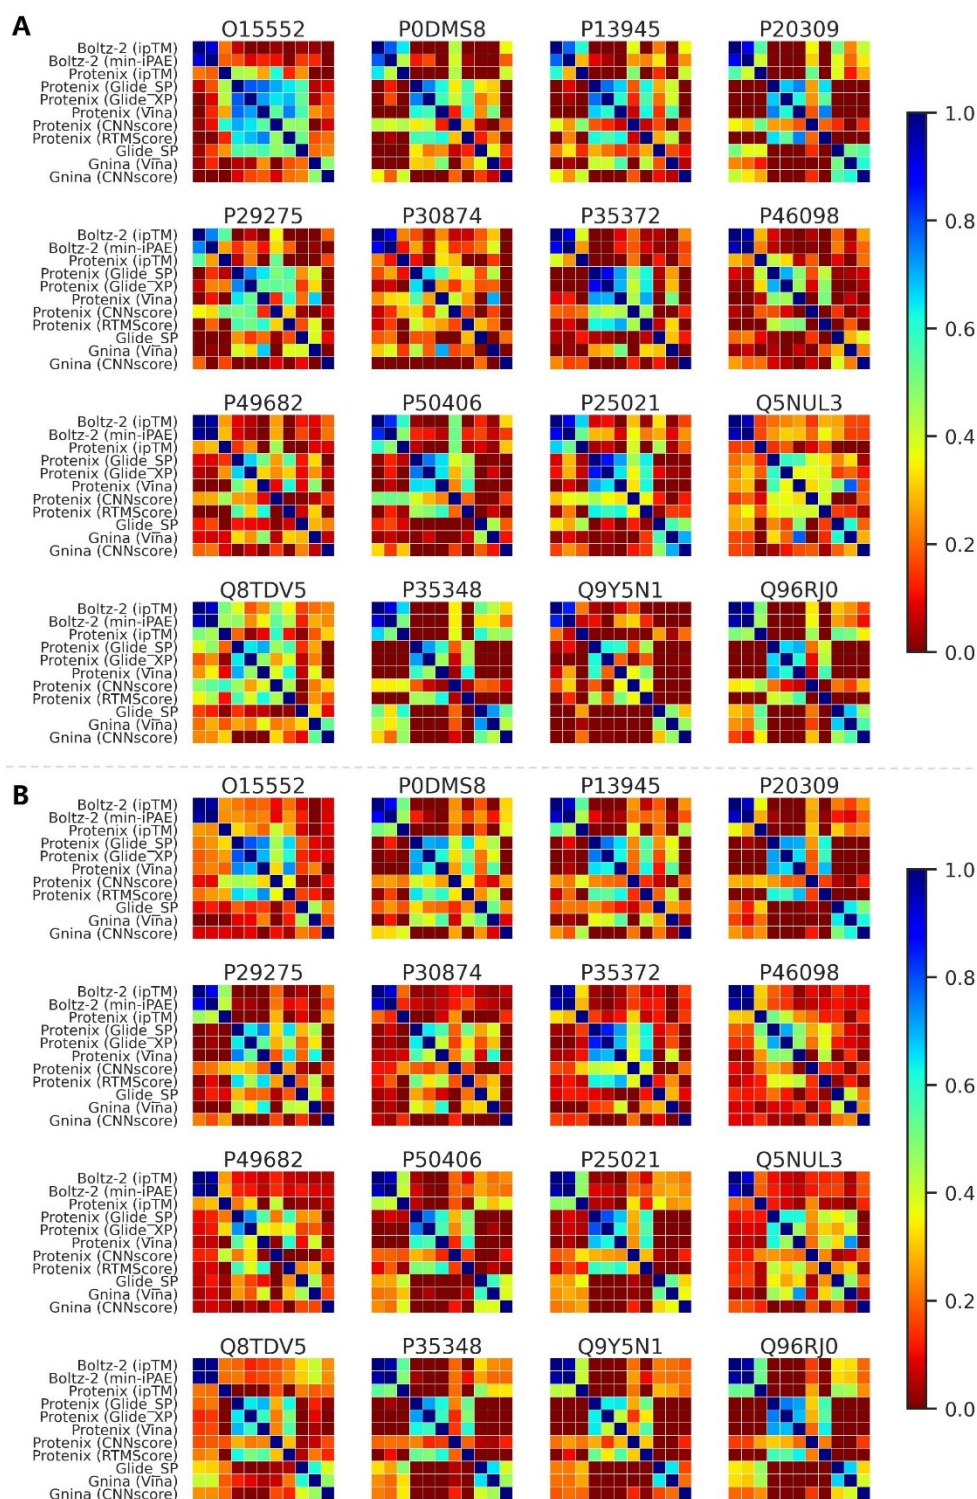

Figure S15. Spearman's rank correlation between different screening tools for (A) active compounds and (B) total compounds across targets in  $GPCR_{recent}$  dataset.



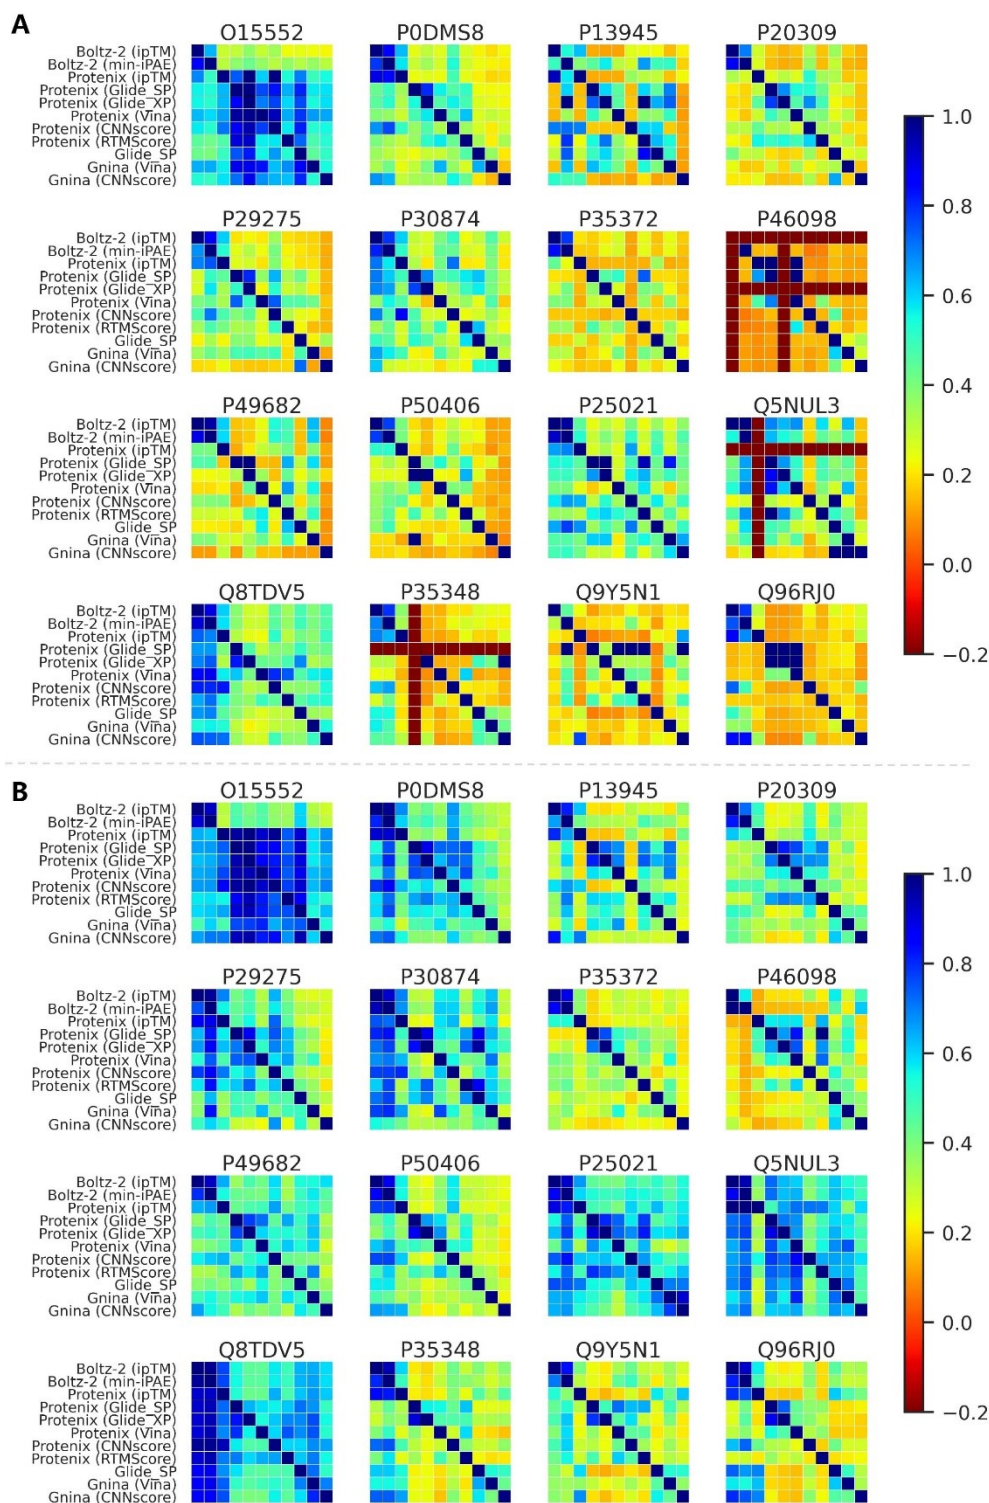

Figure S16. Mean molecular similarities of active compounds to their nearest neighbors among (A) top 100 and (B) top 500 compounds identified by different screening tools across targets in *GPCR<sub>recent</sub>* dataset. Similarity is quantified using the Tanimoto coefficients based on ECFP4 fingerprints. Each row represents the similarities of the actives identified by one method (row label), with values indicating their mean similarity to the nearest neighbors found by each of the other approaches (column label). A value below 0 indicates that no active compound was identified by one of the compared methods at the specified threshold.



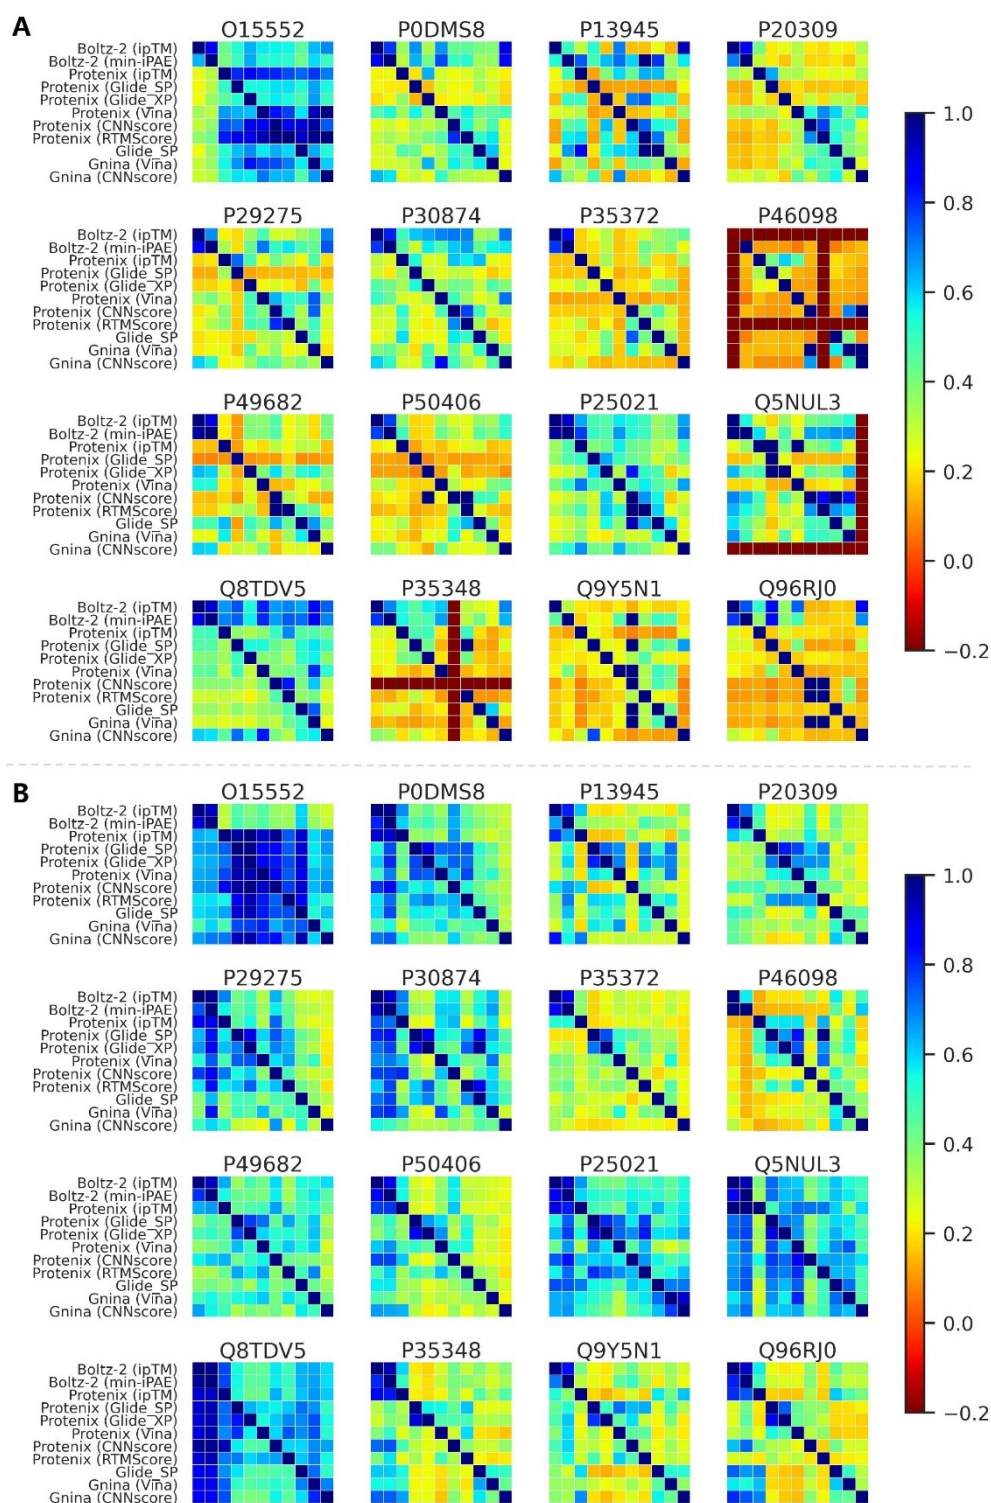

Figure S17. Mean Murcko scaffold similarities of active compounds to their nearest neighbors among (A) top 100 and (B) top 500 compounds identified by different screening tools across targets in *GPCR<sub>recent</sub>* dataset. Similarity is quantified using the Tanimoto coefficients based on ECFP4 fingerprints. Each row represents the similarities of the actives identified by one method (row label), with values indicating their mean similarity to the nearest neighbors found by each of the other approaches (column label). A value below 0 indicates that no active compound was identified by one of the compared methods at the specified threshold.
